# Supplementary material
Source: publisher figshare collection journal article supplement (https://acs.figshare.com/ndownloader/files/5105557)
Supplement: Supplementary file 1 [file 5105557]

# Photocatalyst of Lamellar Aggregates of $\text{RuO}_x$ -loaded Perovskite Nanosheets for Overall Water Splitting

*Yasuo Ebina,\* Nobuyuki Sakai, and Takayoshi Sasaki*

## Supporting Information Figure Caption

**Figure S1.** SEM image of restacked products, ex- $\text{Ca}_2\text{Nb}_3\text{O}_{10}/\text{K}^+/\text{Ru}$

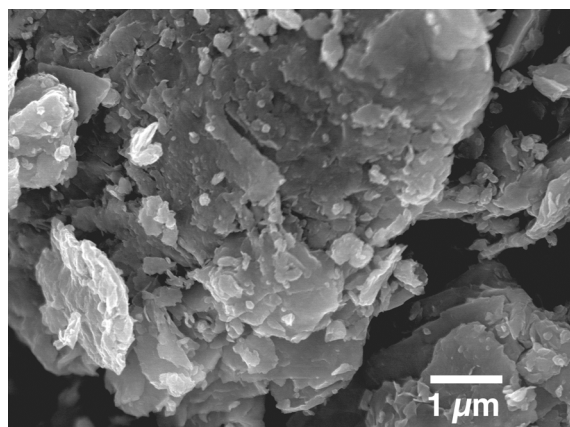

Figure S1
